# Supplementary material
Source: MDPI journal article supplement (https://www.mdpi.com/1999-4907/13/2/184)
Supplement: s1 [file s1]

## Supplementary Material

**Table S1.** Unmodified soil physical parameter values sourced by APSIM from the SLGA for the Shallow Site.

| Depth<br>(cm) | BD<br>(g/cc) | Air dry<br>(mm/mm) | LL15<br>(mm/mm) | DUL<br>(mm/mm) | SAT<br>(mm/mm) | KS<br>(mm/day) | SWCON<br>(/d) |
|---------------|--------------|--------------------|-----------------|----------------|----------------|----------------|---------------|
| 0–15          | 1.41         | 0.05               | 0.16            | 0.27           | 0.41           | 39.5           | 0.460         |
| 15–30         | 1.45         | 0.06               | 0.17            | 0.26           | 0.41           | 15.4           | 0.330         |
| 30–45         | 1.44         | 0.07               | 0.20            | 0.29           | 0.42           | 5.7            | 0.206         |
| 45–60         | 1.43         | 0.07               | 0.22            | 0.31           | 0.43           | 3.4            | 0.154         |
| 60–80         | 1.44         | 0.07               | 0.22            | 0.31           | 0.42           | 3.1            | 0.117         |
| 80–100        | 1.45         | 0.07               | 0.22            | 0.31           | 0.42           | 3.4            | 0.126         |

**Table S2.** Modified soil physical parameter values as used in simulations for the Shallow Site, including measured values and additional depths.

| Depth<br>(cm) | BD<br>(g/cc) | Air dry<br>(mm/mm) | LL15<br>(mm/mm) | DUL<br>(mm/mm) | SAT<br>(mm/mm) | KS<br>(mm/day) | SWCON<br>(/d) |
|---------------|--------------|--------------------|-----------------|----------------|----------------|----------------|---------------|
| 0–15          | 1.41         | 0.05               | 0.16            | 0.27           | 0.41           | 39.5           | 0.460         |
| 15–30         | 1.45         | 0.06               | 0.17            | 0.26           | 0.41           | 15.4           | 0.330         |
| 30–45         | 1.44         | 0.07               | 0.2             | 0.29           | 0.42           | 5.7            | 0.206         |
| 45–60         | 1.43         | 0.07               | 0.22            | 0.31           | 0.43           | 3.4            | 0.154         |
| 60–80         | 1.44         | 0.07               | 0.22            | 0.31           | 0.42           | 3.1            | 0.117         |
| 80–100        | 1.45         | 0.07               | 0.22            | 0.31           | 0.42           | 3.4            | 0.126         |
| 100–120       | 1.45         | 0.07               | 0.22            | 0.31           | 0.42           | 3.4            | 0.126         |
| 120–200       | 1.45         | 0.07               | 0.22            | 0.31           | 0.42           | 3.4            | 0.126         |
| 200–300       | 1.45         | 0.07               | 0.22            | 0.31           | 0.42           | 3.4            | 0.000         |
| 300–500       | 1.45         | 0.07               | 0.22            | 0.31           | 0.42           | 3.4            | 0.000         |
| 500–<br>1000  | 1.45         | 0.07               | 0.22            | 0.31           | 0.42           | 3.4            | 0.000         |

**Table S3.** Unmodified soil chemical parameter values sourced by APSIM from the SLGA for the Shallow Site.

| Depth (cm) | pH   | OC (%) | Soil C:N ratio (g/g) | FBiom (0-1) | Flert (0-1) | Fresh organic matter (kg/ha) |
|------------|------|--------|----------------------|-------------|-------------|------------------------------|
| 0–15       | 5.39 | 2.47   | 32.02                | 0.040       | 0.174       | 475.5                        |
| 15–30      | 6.49 | 0.83   | 12.07                | 0.031       | 0.442       | 303.2                        |
| 30–45      | 6.85 | 0.41   | 12.07                | 0.014       | 0.849       | 193.3                        |
| 45–60      | 7.19 | 0.37   | 12.07                | 0.010       | 0.932       | 123.3                        |
| 60–80      | 7.43 | 0.35   | 12.07                | 0.010       | 0.982       | 67.6                         |
| 80–100     | 7.61 | 0.31   | 12.07                | 0.010       | 1.000       | 37.1                         |

**Table S4.** Modified soil chemical parameter values as used in simulations for the Shallow Site, including measured values and additional depths.

| Depth (cm) | pH   | OC (%) | Soil C:N ratio (g/g) | FBiom (0-1) | Flert (0-1) | Fresh organic matter (kg/ha) |
|------------|------|--------|----------------------|-------------|-------------|------------------------------|
| 0–15       | 5.90 | 1.93   | 12.48                | 0.040       | 0.174       | 475.5                        |
| 15–30      | 6.10 | 0.78   | 12.48                | 0.031       | 0.442       | 303.2                        |
| 30–45      | 6.40 | 0.38   | 12.48                | 0.014       | 0.849       | 193.3                        |
| 45–60      | 6.70 | 0.00   | 12.48                | 0.010       | 0.932       | 123.3                        |
| 60–80      | 7.00 | 0.33   | 12.48                | 0.010       | 0.982       | 67.6                         |
| 80–100     | 7.10 | 0.29   | 12.48                | 0.010       | 1.000       | 37.1                         |
| 100–120    | 7.10 | 0.29   | 12.48                | 0.010       | 1.000       | 37.1                         |
| 120–200    | 7.10 | 0.29   | 12.48                | 0.010       | 1.000       | 37.1                         |
| 200–300    | 7.10 | 0.29   | 12.48                | 0.010       | 1.000       | 37.1                         |
| 300–500    | 7.10 | 0.29   | 12.48                | 0.010       | 1.000       | 37.1                         |
| 500–1000   | 7.10 | 0.29   | 12.48                | 0.010       | 1.000       | 37.1                         |

**Table S5.** Unmodified soil physical parameter values sourced by APSIM from the SLGA for the Deep Site.

| Depth<br>(cm) | BD<br>(g/cc) | Air dry<br>(mm/mm) | LL15<br>(mm/mm) | DUL<br>(mm/mm) | SAT<br>(mm/mm) | KS<br>(mm/day) | SWCON<br>(/d) |
|---------------|--------------|--------------------|-----------------|----------------|----------------|----------------|---------------|
| 0–15          | 1.48         | 0.02               | 0.07            | 0.14           | 0.37           | 189.6          | 0.605         |
| 15–30         | 1.50         | 0.02               | 0.07            | 0.13           | 0.37           | 154.0          | 0.588         |
| 30–45         | 1.50         | 0.02               | 0.07            | 0.13           | 0.37           | 111.2          | 0.553         |
| 45–60         | 1.50         | 0.03               | 0.08            | 0.13           | 0.37           | 92.6           | 0.530         |
| 60–80         | 1.51         | 0.03               | 0.08            | 0.14           | 0.37           | 84.7           | 0.473         |
| 80–100        | 1.53         | 0.03               | 0.08            | 0.14           | 0.36           | 81.5           | 0.470         |
| 100–120       | 1.53         | 0.03               | 0.09            | 0.14           | 0.36           | 79.4           | 0.468         |

**Table S6.** Modified soil physical parameter values as used in simulations for the Deep Site, including measured values and additional depths.

| Depth<br>(cm) | BD<br>(g/cc) | Air dry<br>(mm/mm) | LL15<br>(mm/mm) | DUL<br>(mm/mm) | SAT<br>(mm/mm) | KS<br>(mm/day) | SWCON<br>(/d) |
|---------------|--------------|--------------------|-----------------|----------------|----------------|----------------|---------------|
| 0–15          | 1.48         | 0.02               | 0.07            | 0.14           | 0.37           | 189.6          | 0.605         |
| 15–30         | 1.50         | 0.02               | 0.07            | 0.13           | 0.37           | 154.0          | 0.588         |
| 30–45         | 1.50         | 0.02               | 0.07            | 0.13           | 0.37           | 111.2          | 0.553         |
| 45–60         | 1.50         | 0.03               | 0.08            | 0.13           | 0.37           | 92.6           | 0.530         |
| 60–80         | 1.51         | 0.03               | 0.08            | 0.14           | 0.37           | 84.7           | 0.473         |
| 80–100        | 1.53         | 0.03               | 0.08            | 0.14           | 0.36           | 81.5           | 0.470         |
| 100–120       | 1.53         | 0.03               | 0.09            | 0.14           | 0.36           | 79.4           | 0.468         |
| 120–200       | 1.53         | 0.03               | 0.09            | 0.14           | 0.36           | 79.4           | 0.468         |
| 200–2250      | 1.53         | 0.03               | 0.09            | 0.14           | 0.36           | 79.4           | 0.468         |
| 2250–2300     | 1.53         | 0.03               | 0.09            | 0.14           | 0.36           | 79.4           | 0.468         |
| 2300–3000     | 1.53         | 0.03               | 0.09            | 0.14           | 0.36           | 79.4           | 0.000         |

**Table S7.** Unmodified soil chemical parameter values sourced by APSIM from the SLGA for the Deep Site.

| Depth<br>(cm) | pH   | OC<br>(%) | Soil<br>C:N ra-<br>tio<br>(g/g) | FBiom<br>(0-1) | Finert<br>(0-1) | Fresh or-<br>ganic<br>matter<br>(kg/ha) |
|---------------|------|-----------|---------------------------------|----------------|-----------------|-----------------------------------------|
| 0–15          | 4.95 | 4.96      | 39.20                           | 0.04           | 0.09            | 417.7                                   |
| 15–30         | 5.72 | 0.65      | 10.00                           | 0.03           | 0.17            | 287.1                                   |
| 30–45         | 5.80 | 0.26      | 10.00                           | 0.01           | 0.43            | 197.3                                   |
| 45–60         | 5.89 | 0.12      | 10.00                           | 0.01           | 0.90            | 135.6                                   |
| 60–80         | 5.97 | 0.16      | 10.00                           | 0.01           | 0.73            | 82.2                                    |
| 80–100        | 6.04 | 0.25      | 10.00                           | 0.01           | 0.44            | 49.9                                    |
| 100–120       | 6.10 | 0.28      | 10.00                           | 0.01           | 0.38            | 30.3                                    |

**Table S8.** Modified soil chemical parameter values as used in simulations for the Deep Site, including measured values and additional depths.

| Depth<br>(cm) | pH   | OC<br>(%) | Soil<br>C:N<br>ratio<br>(g/g) | FBiom<br>(0-1) | Finert<br>(0-1) | Fresh<br>organic<br>matter<br>(kg/ha) |
|---------------|------|-----------|-------------------------------|----------------|-----------------|---------------------------------------|
| 0–15          | 6.10 | 1.20      | 29.00                         | 0.04           | 0.08            | 417.7                                 |
| 15–30         | 5.50 | 0.50      | 28.00                         | 0.03           | 0.10            | 287.1                                 |
| 30–45         | 5.80 | 0.30      | 28.00                         | 0.01           | 0.10            | 197.3                                 |
| 45–60         | 5.90 | 0.40      | 28.00                         | 0.01           | 0.20            | 135.6                                 |
| 60–80         | 6.00 | 0.40      | 28.00                         | 0.01           | 0.30            | 82.2                                  |
| 80–100        | 6.00 | 0.40      | 28.00                         | 0.01           | 0.40            | 49.9                                  |
| 100–120       | 6.10 | 0.40      | 28.00                         | 0.01           | 0.50            | 30.3                                  |
| 120–200       | 6.10 | 0.40      | 42.10                         | 0.01           | 1.00            | 30.3                                  |
| 200–2250      | 6.10 | 0.40      | 42.10                         | 0.01           | 1.00            | 30.3                                  |
| 2250–2300     | 6.10 | 0.40      | 42.10                         | 0.01           | 1.00            | 30.3                                  |
| 2300–3000     | 6.10 | 42.10     | 0.01                          | 1.00           | 30.30           | 30.3                                  |
